# Supplementary material for: Chemical Composition of Newborn Piglets with Different Weights at Birth in Sows with a High Reproductive Performance
Source: MDPI journal article supplement (doi:10.3390/ani14091380), 2024-05-04
Supplement: s1 [file s1]

**Supplementary file**

**Table S1.** Amino acid contents of newborn piglets according to body weight at the time of birth.

| Parameter<br>(g/kg DM) | Body weight (kg) |      |               |      |                |            |      |
|------------------------|------------------|------|---------------|------|----------------|------------|------|
|                        | <0.8 (n=2)       |      | 0.8-1.2 (n=2) |      | >1.2-1.6 (n=4) | >1.6 (n=2) |      |
| Asparagine             | 54.2             | 49.8 | 50.0          | 52.4 | 49.0±1.33      | 47.6       | 50.7 |
| Threonine              | 24.7             | 21.8 | 20.1          | 22.4 | 22.0±1.05      | 18.8       | 22.6 |
| Serine                 | 31.0             | 27.5 | 27.6          | 30.1 | 28.8±2.11      | 25.3       | 28.9 |
| Glutamine              | 91.1             | 82.5 | 80.8          | 86.3 | 83.3±2.88      | 76.5       | 85.0 |
| Glycine                | 66.0             | 62.7 | 65.6          | 66.3 | 61.3±3.26      | 62.6       | 64.0 |
| Alanine                | 44.0             | 41.5 | 42.5          | 43.0 | 41.1±1.89      | 40.8       | 42.3 |
| Valine                 | 33.2             | 29.2 | 28.3          | 30.6 | 28.2±0.850     | 27.7       | 30.0 |
| Cysteine               | 5.65             | 5.26 | 4.86          | 5,79 | 7.91±1.32      | 4.59       | 5.31 |
| Methionine             | 8.15             | 8.59 | 7.67          | 8.15 | 8.90±0.822     | 7.69       | 8.42 |
| Ileucine               | 19.4             | 18.2 | 16.5          | 17.7 | 18.1±0.623     | 15.8       | 17.5 |
| Leucine                | 46.1             | 40.9 | 41.5          | 43,7 | 42.7±1.50      | 39.4       | 42.8 |
| Tyrosine               | 18.2             | 16.1 | 15.9          | 16.9 | 16.6±0.873     | 15.0       | 17.7 |
| Phenylalanine          | 24.4             | 22.0 | 21.8          | 23.0 | 25.2±1.16      | 20.8       | 22.5 |
| Histadine              | 14.8             | 12.8 | 14.5          | 14.4 | 14.5±0.625     | 13.9       | 14.3 |
| Lysine                 | 41.1             | 36.2 | 37.5          | 38.3 | 38.8±2.27      | 35.3       | 38.1 |
| Arginine               | 43.5             | 40.8 | 40.7          | 42.4 | 42.0±5.24      | 38.2       | 40.7 |
| Proline                | 45.4             | 40.7 | 41.3          | 45.1 | 44.5±3.17      | 39.8       | 44.2 |
